# Supplementary material for: Ten Simple Rules for Getting Ahead as a Computational Biologist in Academia
Source: PLOS journal article supplement (doi:10.1371/journal.pcbi.1002001), 2011-01-06
Supplement: S1 (10.1371/journal.pcbi.1002001.s001) [file journal.pcbi.1002001.s001]

301 Moved Permanently

# Moved Permanently

The document has moved here.

---

Apache Server at www.ploscompbiol.org Port 80
